# Supplementary figures and images for: The modulation of savouring by prediction error and its effects on choice
Source: eLife journal article supplement (doi:10.7554/elife.13747), 2016-04-21

A

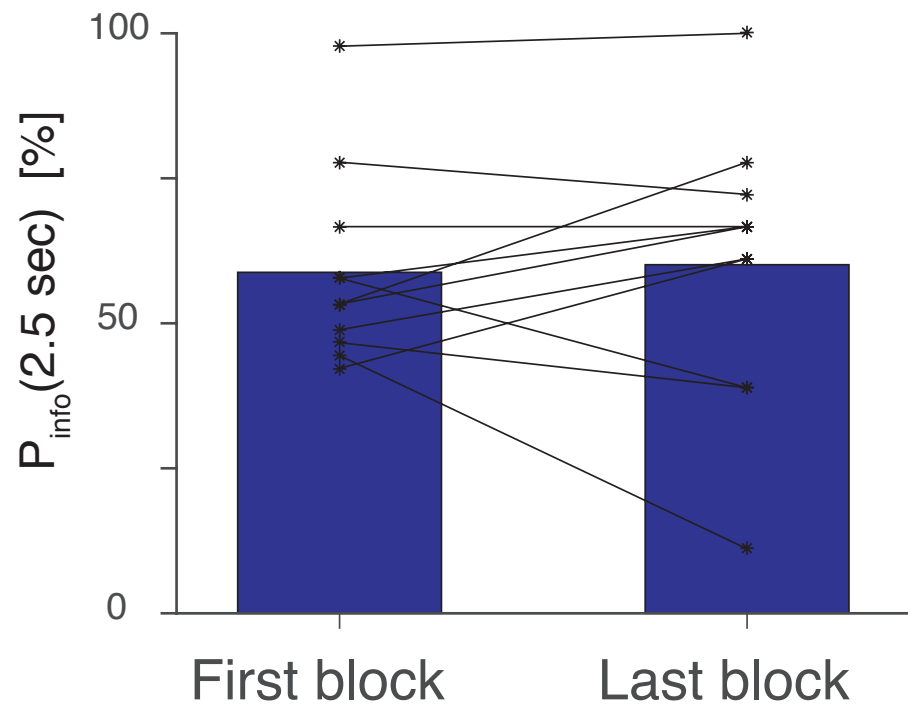

B

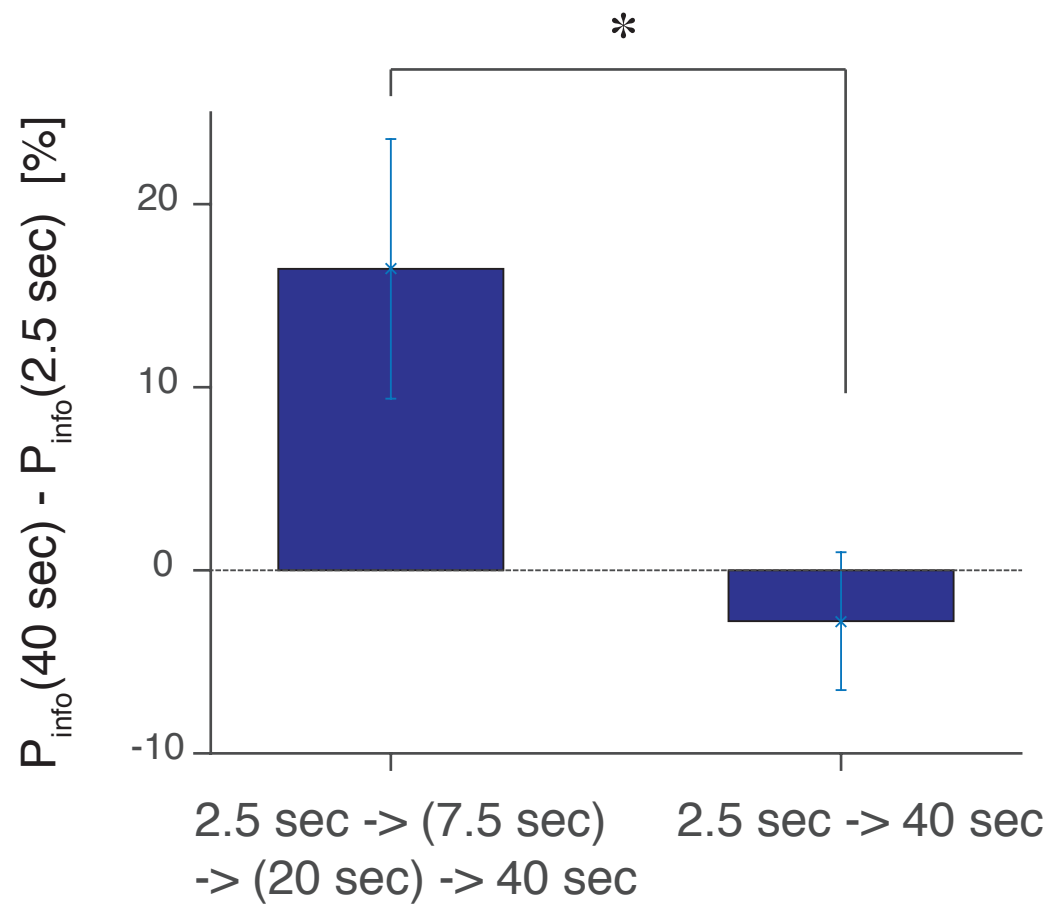

Supplement: supp [file elife-13747-supp-v1.zip]

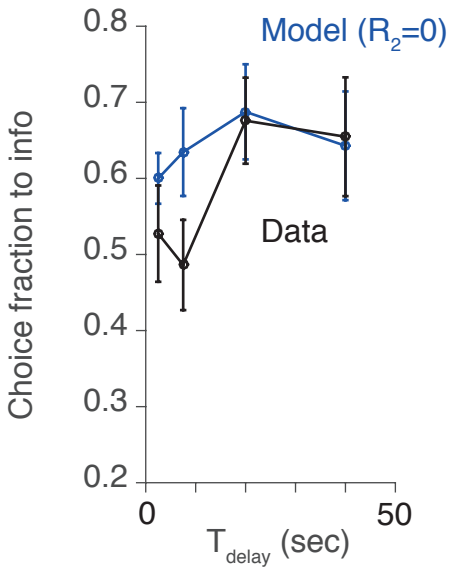

Supplement: supp [file elife-13747-supp-v1.zip]

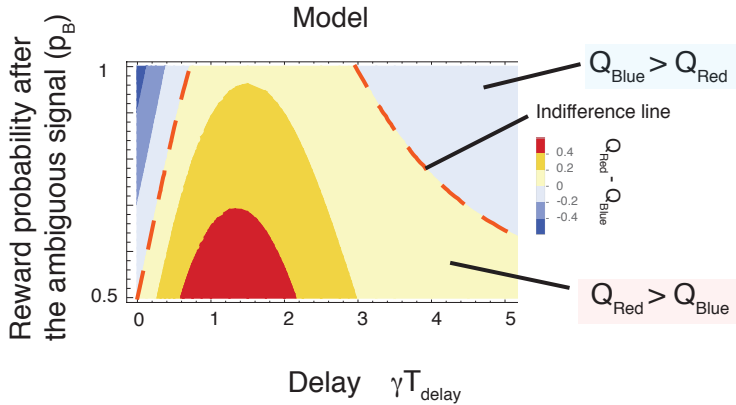

Supplement: supp [file elife-13747-supp-v1.zip]

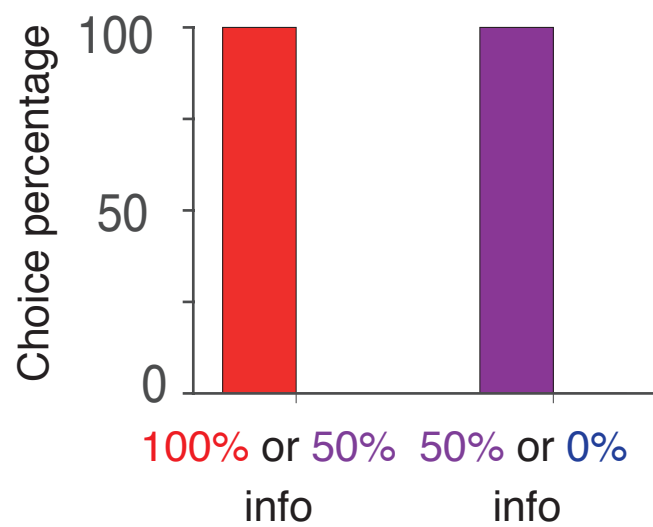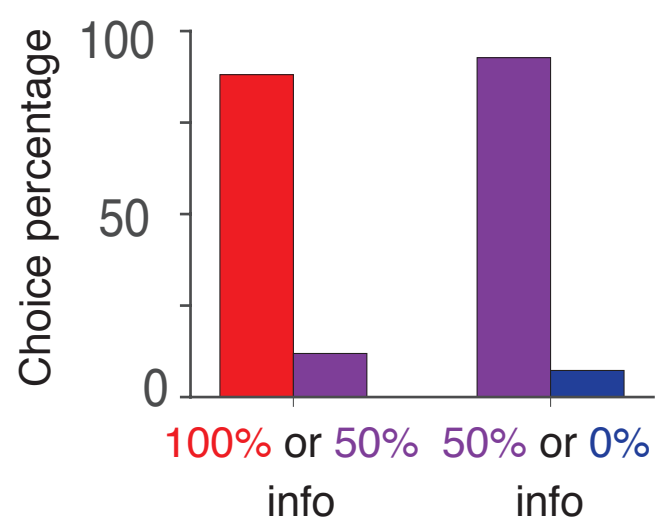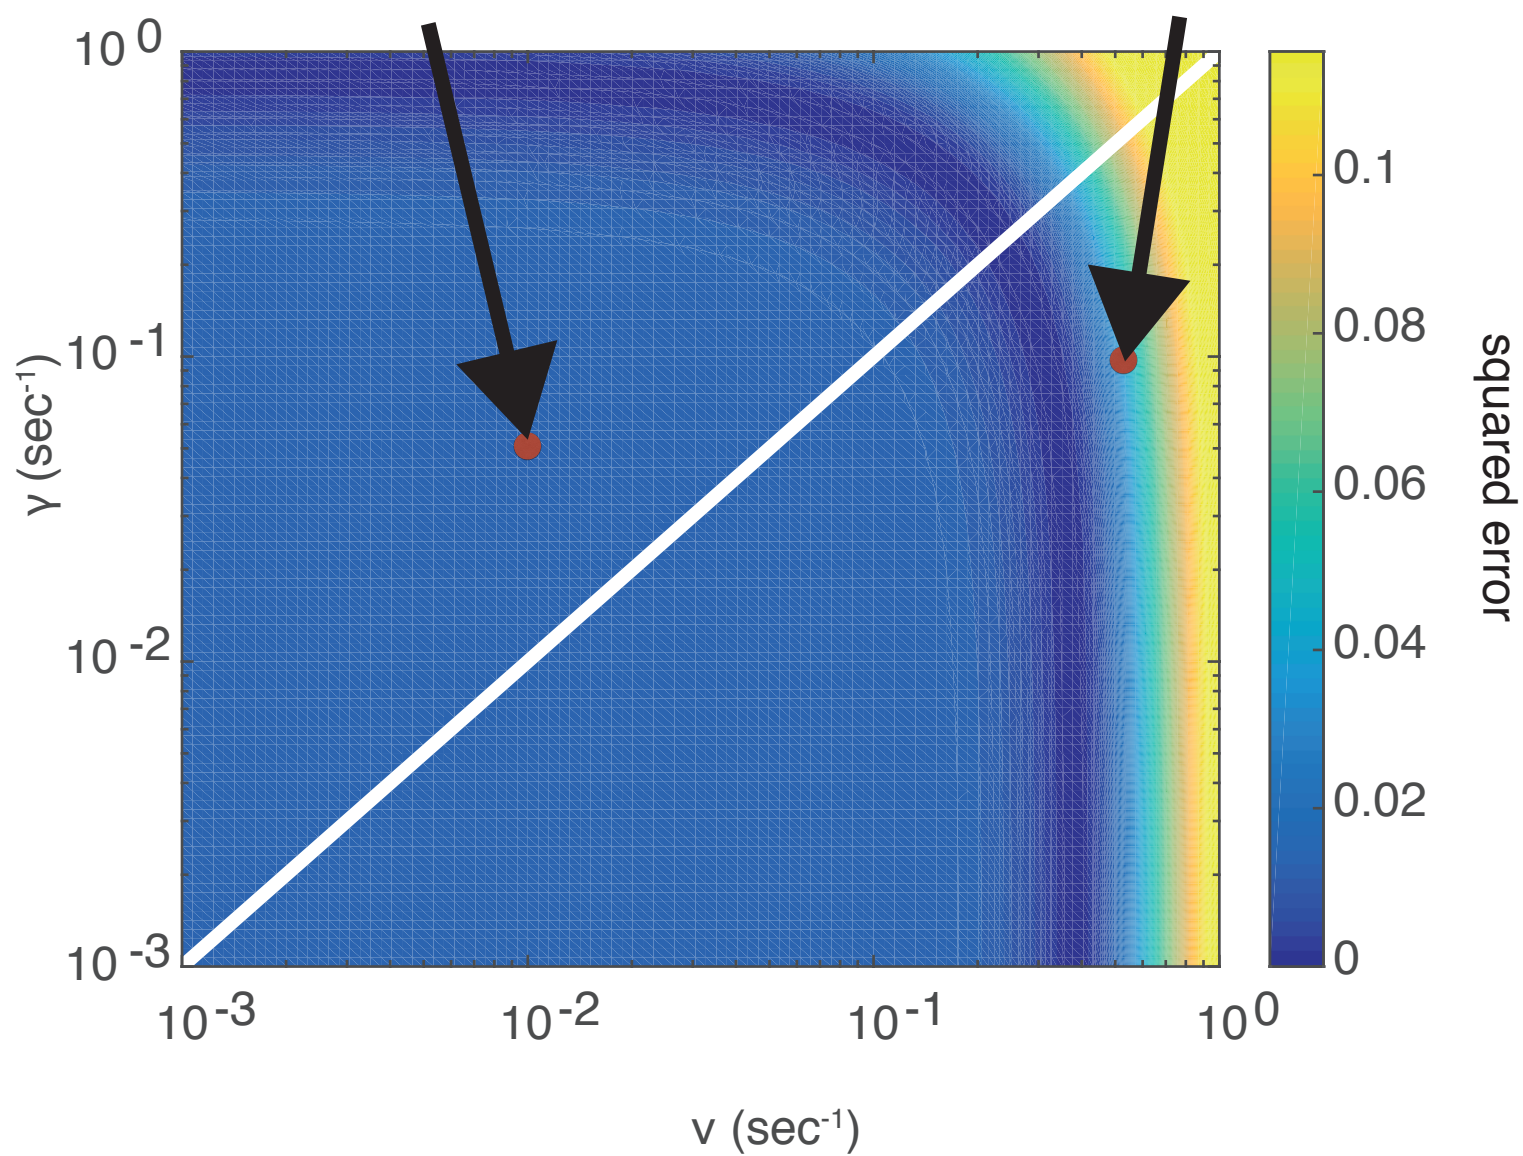

Supplement: supp [file elife-13747-supp-v1.zip]

**A**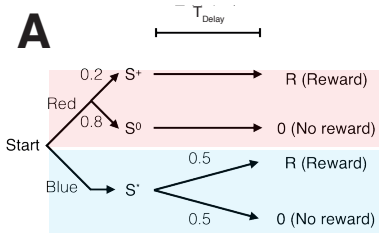**B**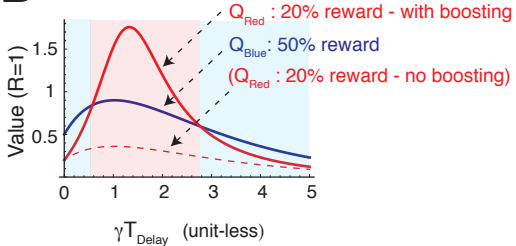

Supplement: supp [file elife-13747-supp-v1.zip]

# Anticipation model with no RPE-boosting

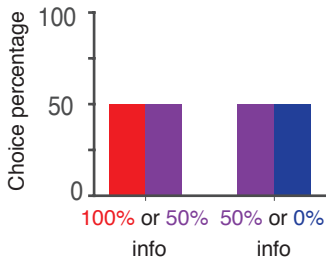

Supplement: supp [file elife-13747-supp-v1.zip]
